# Supplementary material for: Singlet–triplet annihilation in single LHCII complexes
Source: PubMed Central journal article supplement (PMC11289710; doi:10.1039/c5cp01806d), 2015-07-03
Supplement: CP-017-C5CP01806D-s001.pdf [file CP-017-C5CP01806D-s001.pdf]

## Singlet–Triplet Annihilation in Single LHClI Complexes

J. Michael Gruber,<sup>a,\*</sup> Jevgenij Chmeliov,<sup>b,c</sup> Tjaart P. J. Kruger,<sup>d</sup> Leonas Valkunas,<sup>b,c</sup> and Rienk van Grondelle<sup>a,\*</sup>

<sup>a</sup> Department of Biophysics, Faculty of Sciences, Vrije Universiteit, De Boeleaan 1081, 1081HV Amsterdam, The Netherlands

<sup>b</sup> Department of Theoretical Physics, Faculty of Physics, Vilnius University, Saulėtekio Ave. 9, LT-10222 Vilnius, Lithuania

<sup>c</sup> Institute of Physics, Center for Physical Sciences and Technology, Goštauto 11, LT-01108 Vilnius, Lithuania

<sup>d</sup> Department of Physics, Faculty of Natural and Agricultural Sciences, University of Pretoria, Private bag X20, Hatfield 0028, South Africa

\*Corresponding authors: j.m.gruber@vu.nl, r.van.grondelle@vu.nl

**Electronic Supplementary Information**

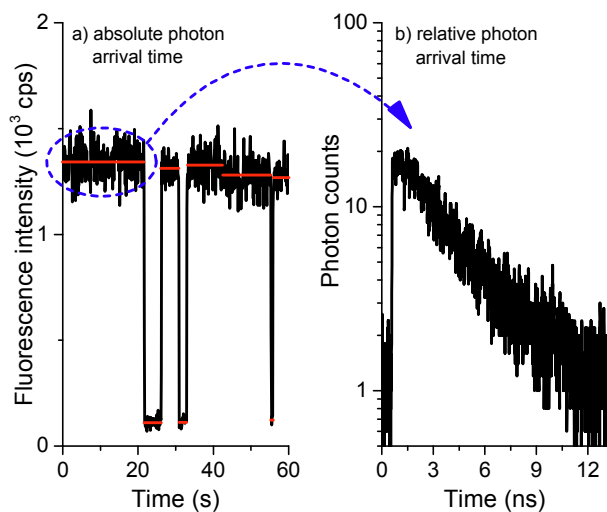

**Fig. S1** Left side: illustration of a typical fluorescence intensity trace, reconstructed from the absolute arrival time of detected photons with a binning time of 10 ms (black line). The red lines indicate the fitted intensity levels used for further analysis. Right side: the fluorescence decay of the first intensity level, reconstructed from the relative arrival time of the detected photons.

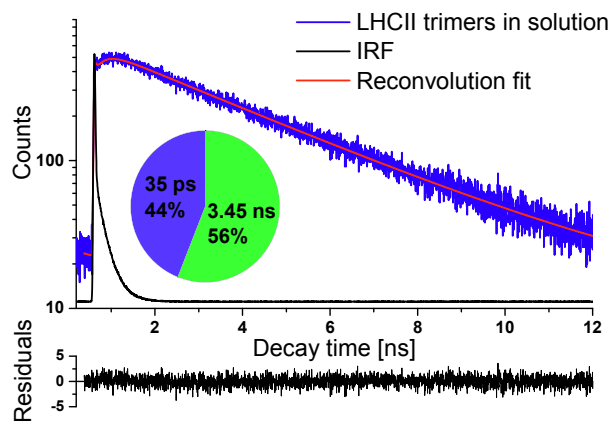

**Fig. S2** Ensemble measurement of the fluorescence decay of solubilized LHCII trimers. Kinetics were measured at an average excitation power of  $3 \mu\text{W}$  and can be fitted with similar lifetime components as kinetics obtained from the single-molecule measurements. The excitation intensity varies within the confocal excitation spot and, together with three-dimensional diffusion, this results in non-trivial annihilation kinetics that cannot be directly compared with the results of single complexes.

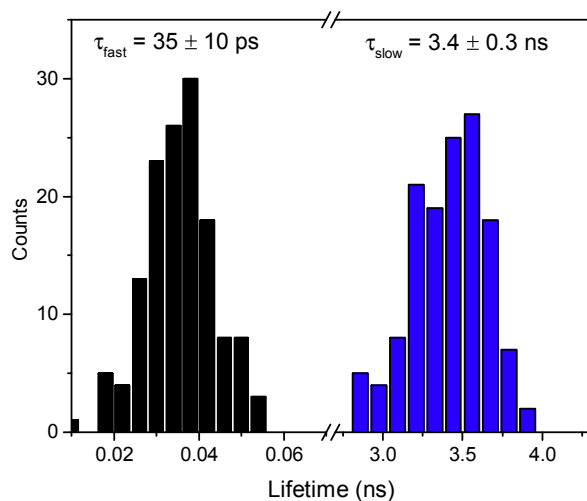

**Fig. S3** Histogram of lifetimes from a two-exponential fit of 100 individually analyzed LHCII trimers.

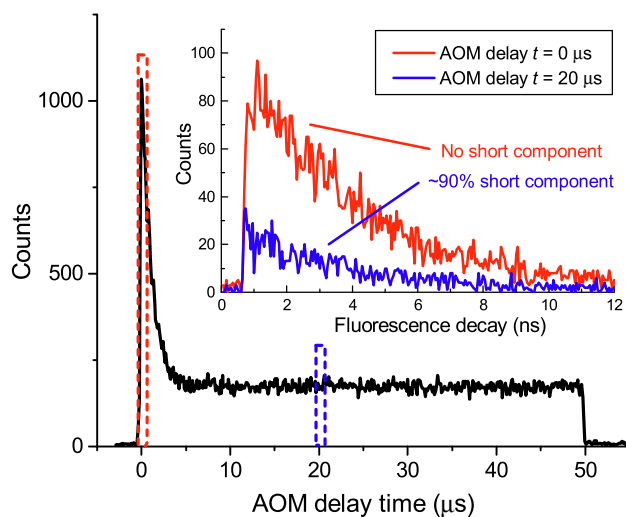

**Fig. S4** AOM histogram, measured at  $500 \text{ W/cm}^2$  with *on*- and *off*-times of  $50 \mu\text{s}$ . The inset shows the fluorescence decay (50-ps binning) of photons, detected in the first microsecond (red line) of the AOM modulation and during  $1 \mu\text{s}$  at an AOM delay time of  $20 \mu\text{s}$  (blue line).

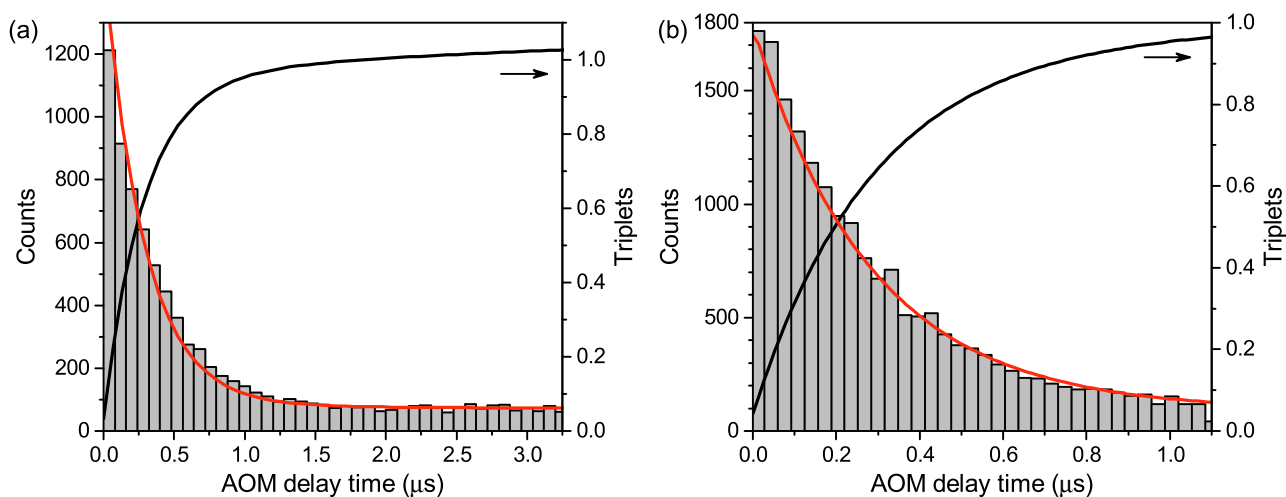

**Fig. S5** AOM histograms, obtained at 10 kHz modulation frequency and 0.033 duty cycle yielding  $t_{\text{on}} = 3.3 \mu\text{s}$  (a) as well as at 30 kHz modulation frequency and 0.033 duty cycle yielding  $t_{\text{on}} = 1.1 \mu\text{s}$  (b). Excitation intensity was  $1500 \text{ W/cm}^2$  in both cases. Red lines indicate re-normalised values of the integral of singlet kinetics between two subsequent laser pulses, calculated at a given AOM delay time according to Eq. 13 using the parameters listed in Table 1 of the manuscript. The time evolution of the triplet states is shown with black lines (right axis).
